# Supplementary material
Source: HighWire-hosted journal article supplement (https://dmd.aspetjournals.org/highwire/filestream/78228/field_highwire_adjunct_files/0/804_supp_data.pdf)
Supplement: 804_supp_data.pdf [file 804_supp_data.pdf]

## Supplemental Data

**DMD-AR-2021-000804**

### **Direct and Sequential Bioactivation of Pemigatinib to Reactive Iminium Ion Intermediates Culminate in Mechanism-Based Inactivation of Cytochrome P450 3A**

Lloyd Wei Tat Tang<sup>1#</sup>, Wan Wei<sup>2#</sup>, Ravi Kumar Verma<sup>2</sup>, Siew Kwan Koh<sup>3</sup>, Lei Zhou<sup>3,4,5</sup>, Hao Fan<sup>2</sup> and Eric Chun Yong Chan<sup>1</sup>

<sup>1</sup>Department of Pharmacy, Faculty of Science, National University of Singapore, Singapore

<sup>2</sup>Bioinformatics Institute (BII), Agency for Science, Technology and Research (A\*STAR), Singapore

<sup>3</sup>Singapore Eye Research Institute (SERI), Singapore

<sup>4</sup>Department of Ophthalmology, Yong Loo Lin School of Medicine, National University of Singapore, Singapore

<sup>5</sup>Ophthalmology and Visual Sciences Academia Clinical Program, Duke-National University of Singapore Medical School, Singapore

*#L.W.T.T and W.W contributed equally to the work.*

**Supplemental Fig. 1.** (A) Representative product ion chromatogram of PEM (retention time: 5.70 min). (B) Proposed accurate mass fragmentation pattern of PEM. The exact mass MS/MS spectra depict the experimental  $m/z$  values whereas the chemical structure (inset) illustrate the theoretical accurate  $m/z$  values of the parent and product ions as outlined in Supplementary Table 2 using a mass tolerance of 5 ppm.

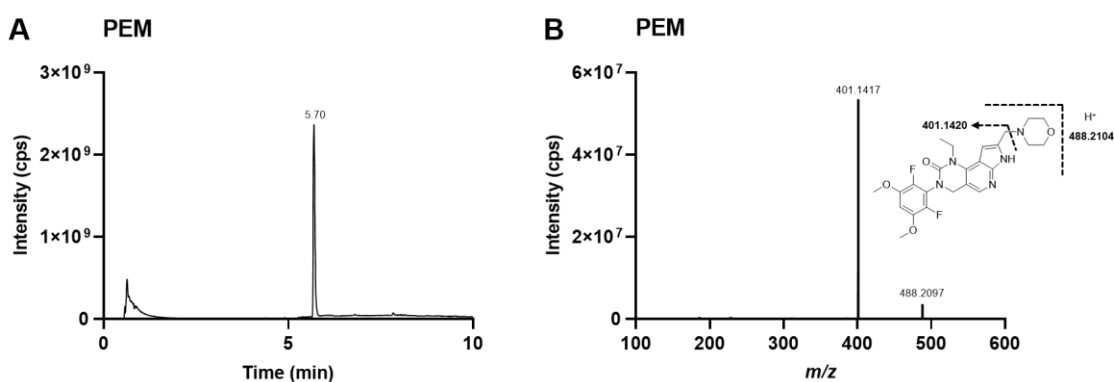

**Supplemental Fig. 2.** Molecular plots illustrating the top scored binding poses for PEM adducts on (A and B) Lys173, (C and D) Lys208, (E and F) Lys209, (G and H) Lys476/475 and (I and J) Lys487/486 in CYP3A4 and CYP3A5 respectively. Color code: F-F' loop, orange; C terminal loop, blue; heme moiety, green; PEM, pink stick with white surface.

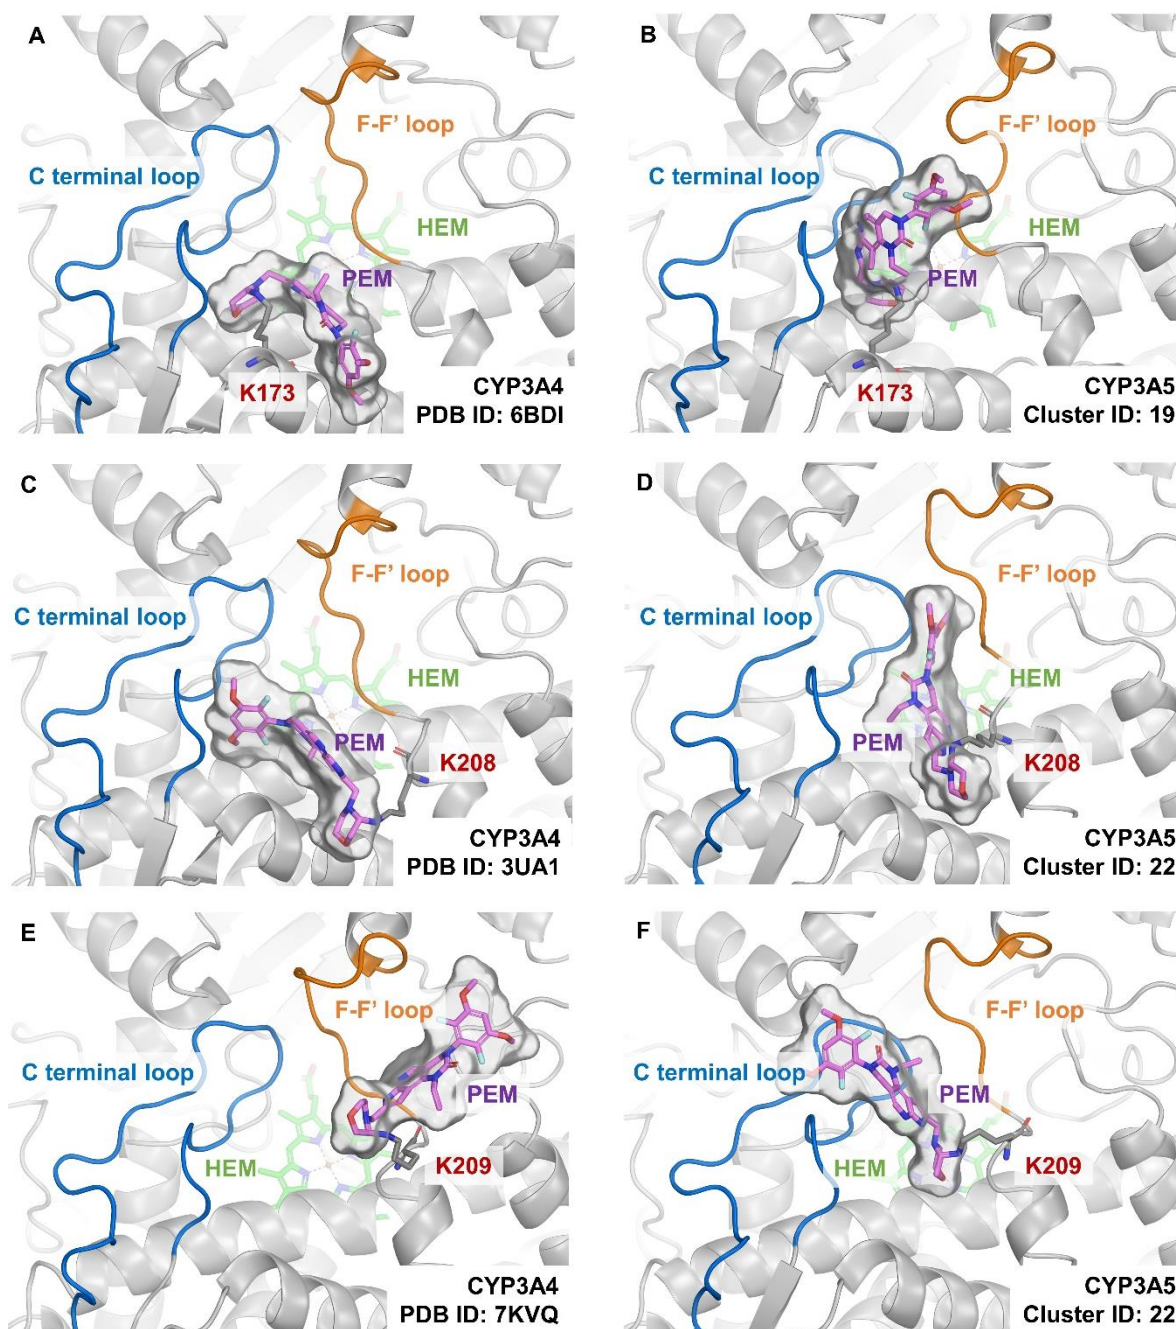

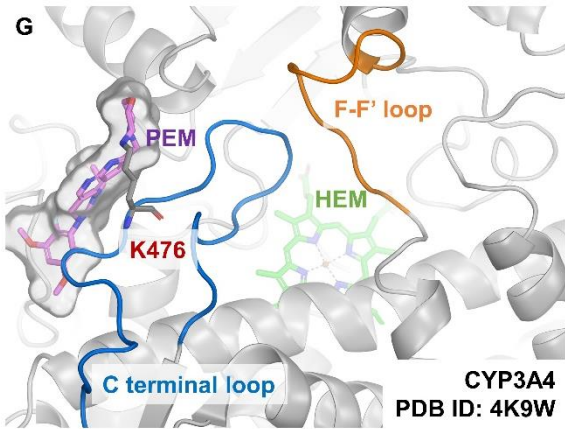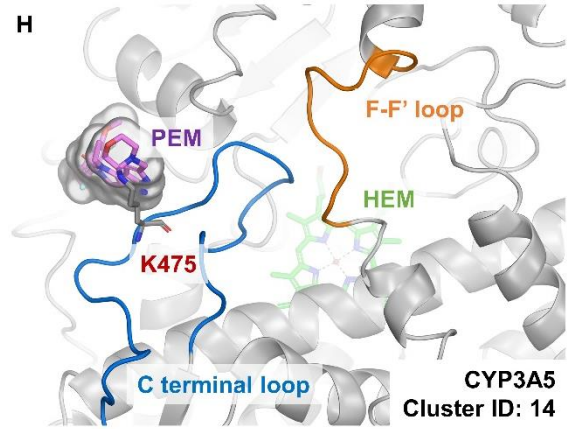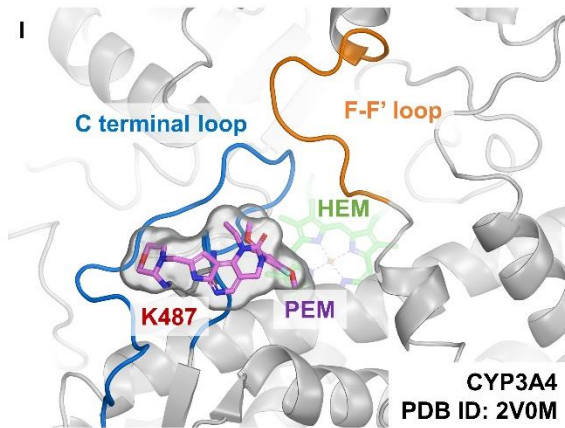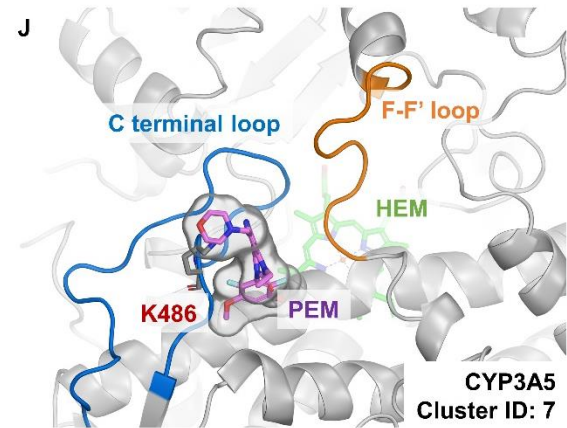

**Supplemental Table 1.** Optimized compound-dependent MS parameters for LC/MS/MS analysis

| <b>Compound</b>                     | <b>Q1<br/>Mass<br/>(<i>m/z</i>)</b> | <b>Q3<br/>Mass<br/>(<i>m/z</i>)</b> | <b>DP<br/>(V)</b> | <b>EP<br/>(V)</b> | <b>CE<br/>(V)</b> | <b>CXP<br/>(V)</b> |
|-------------------------------------|-------------------------------------|-------------------------------------|-------------------|-------------------|-------------------|--------------------|
| <b>Pemigatinib (PEM)</b>            | 488                                 | 401                                 | 78                | 11                | 26                | 12                 |
| <b>Erdafitinib</b>                  | 447                                 | 362                                 | 48                | 10                | 31                | 15                 |
| <b>Hydroxylated<br/>Rivaroxaban</b> | 452                                 | 406                                 | 90                | 10                | 25                | 9                  |
| <b>Dexamethasone</b>                | 393                                 | 355                                 | 112               | 10                | 14                | 14                 |

DP: declustering potential, EP: entrance potential, CE: collision energy, CXP: collision exit potential

**Supplemental Table 2.** Accurate mass measurement of the parent and product ions of PEM using a mass tolerance of 5 ppm.

| Proposed Elemental<br>Composition                                            | Theoretical<br><i>m/z</i> | Experimental<br><i>m/z</i> | Mass Accuracy |              |
|------------------------------------------------------------------------------|---------------------------|----------------------------|---------------|--------------|
|                                                                              |                           |                            | $\Delta$ Da   | $\Delta$ ppm |
| C <sub>24</sub> H <sub>28</sub> O <sub>4</sub> N <sub>5</sub> F <sub>2</sub> | 488.2104                  | 488.2097                   | -0.0007       | -1.4         |
| C <sub>20</sub> H <sub>19</sub> O <sub>3</sub> N <sub>4</sub> F <sub>2</sub> | 401.1420                  | 401.1417                   | -0.0003       | -0.8         |

**Supplemental Table 3.** Summary of covalent docking scores and distances to F-F' loop of the top scored binding poses for PEM adducts on lysine residues in CYP3A4 and CYP3A5.

| CYP3A4  |                |               |                                                | CYP3A5  |                |               |                                                |
|---------|----------------|---------------|------------------------------------------------|---------|----------------|---------------|------------------------------------------------|
| Residue | PDB/Cluster ID | Docking Score | Minimum distance between PEM and F-F' loop (Å) | Residue | PDB/Cluster ID | Docking Score | Minimum distance between PEM and F-F' loop (Å) |
| Lys173  | 6BDI           | -5.3          | 3.4                                            | Lys173  | Cluster 19     | -5.1          | 3.3                                            |
| Lys208  | 3UA1           | -5.3          | 3.5                                            | Lys208  | Cluster 22     | -5.4          | 3.2                                            |
| Lys209  | 7KVQ           | -4.7          | 3.1                                            | Lys209  | Cluster 22     | -3.4          | 3.8                                            |
| Lys476  | 4K9W           | -5.1          | 10.6                                           | Lys475  | Cluster 14     | -5.4          | 13.4                                           |
| Lys487  | 2V0M           | -2.5          | 2.9                                            | Lys486  | Cluster 7      | -2.7          | 3.7                                            |
